# Supplementary material
Source: PubMed Central journal article supplement (PMC2862884)
Supplement: NIHMS190932-supplement-01.pdf [file NIHMS190932-supplement-01.pdf]

**A**

517/506 —

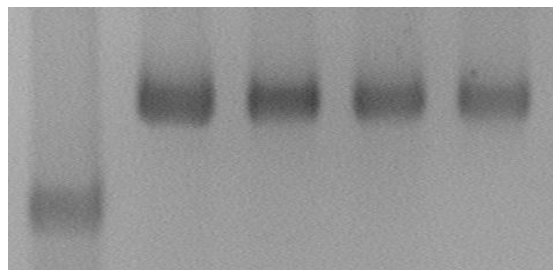

← Elk1

**B**

517/506 —

396 —

344 —

298 —

220 =

201 =

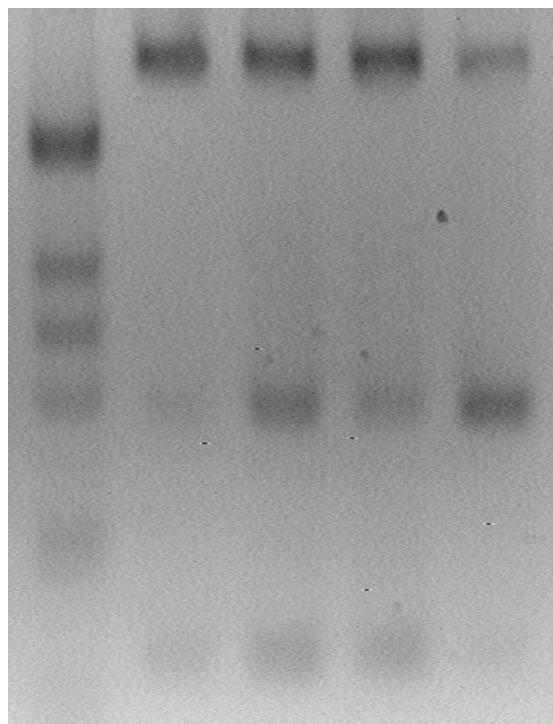

← Elk3

← Elk3b

← Elk3c

**C**

517/506 —

396 —

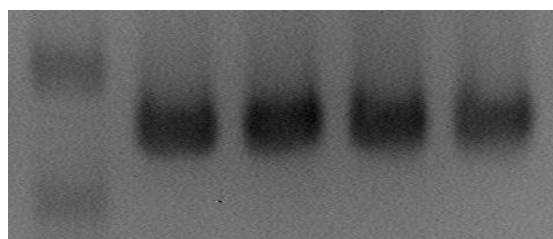

← Elk4

1 2 3 4 5

↓

E3/P2 \*\*\*\*\*  
 Elk3 AGAACATCATCAAGAAAGTGATCGGGCAGAAGTTTGTGTACAAGTTCGTC  
 Pctk2 AGAACATCATCAAGAAAGTGATCGGGCAGAAGTTTGTGTACAAGTTCGTC

E3/P2 \*\*\*\*\*  
 Elk3 TCTTTCCCGGATATCCTGAAAATGGATCCTCACGCGGTAGAGATCAGCCG  
 Pctk2 TCTTTCCCGGATATCCTGAAAATGGATCCTCACGCGGTAGAGATCAGCCG

E3/P2 \*\*\*\*\*  
 Elk3 GGAGAGCCTCCTGCTGCAGGACGGCGACTGTAAGGTGTCCCCGGAAGGCC  
 Pctk2 GGAGAGCCTCCTGCTGCAGGACGGCGACTGTAAGGTGTCCCCGGAAGGCC

E3/P2 \*\*\*\*\*  
 Elk3 GAGAGGTCCACAGGCACGGCTTGTCCCTCCCCTCAAAGTGCCAGCCGCAAC  
 Pctk2 GAGAGGTCCACAGGCACGGCTTGTCCCTCCCCTCAAAGTGCCAGCCGCAAC

E3/P2 \*\*\*\*\*  
 Elk3 GAGTACCTCCACTCGGGCCTCTACTCGTCCTTCACCATCAACTCCCTGCA  
 Pctk2 GAGTACCTCCACTCGGGCCTCTACTCGTCCTTCACCATCAACTCCCTGCA

E3/P2 \*\*\*\*\*  
 Elk3 GAACGCTCCAGAGGCCTTCAAGGCCATCAAGACGGAGAAGCTGGAGGAGC  
 Pctk2 GAACGCTCCAGAGGCCTTCAAGGCCATCAAGACGGAGAAGCTGGAGGAGC

E3/P2 \*\*\*\*\*  
 Elk3 CCTGTGATGACAGCCCCC  
 Pctk2 CCTGTGATGACAGCCCCC

↑

↓

E4/Mf4 \*\*\*\*\*  
Elk4 CAGTTTCCCTCTGTACTCAACAGTCATGGCCCGTTCACTCTGTCAGGCCT  
Mfsd4 CAGTTTCCCTCTGTACTCAACAGTCATGGCCCGTTCACTCTGTCAGGCCT

E4/Mf4 \*\*\*\*\*  
Elk4 GGACGGACCTTCCACTCCGGGCCCATTTTCTCCAGAC  
Mfsd4 GGACGGACCTTCCACTCCGGGCCCATTTTCTCCAGAC

↑

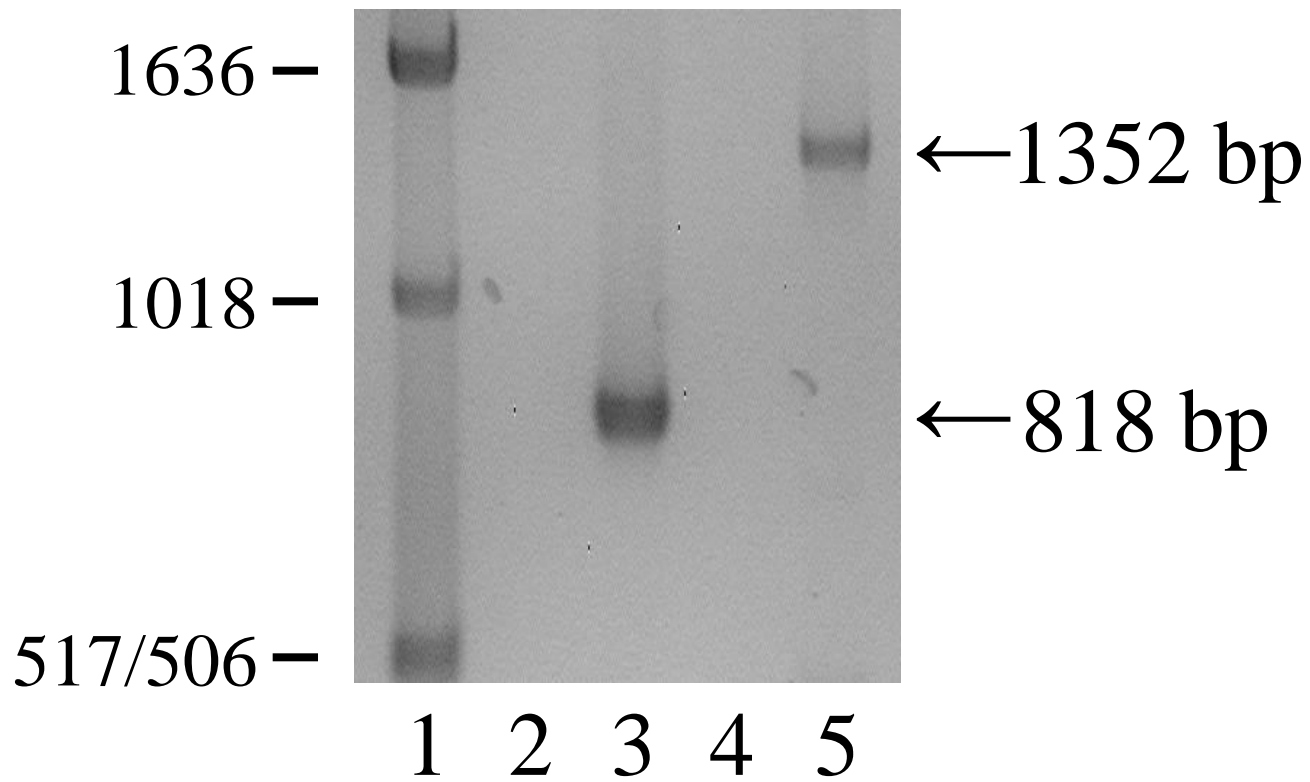

Supplemental Fig. S4.

mRNAs

proteins

MFS domain

Mfsd4a,  
Mfsf4c

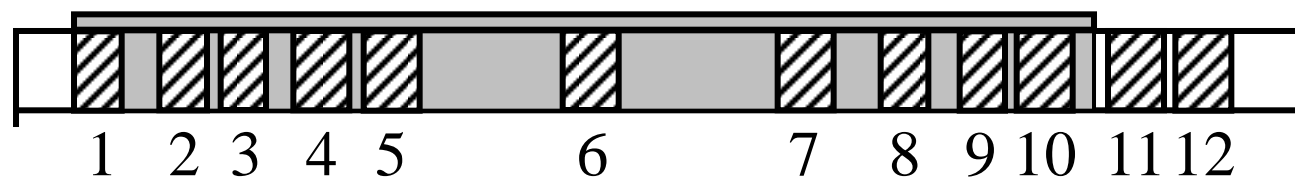

Mfsd4b

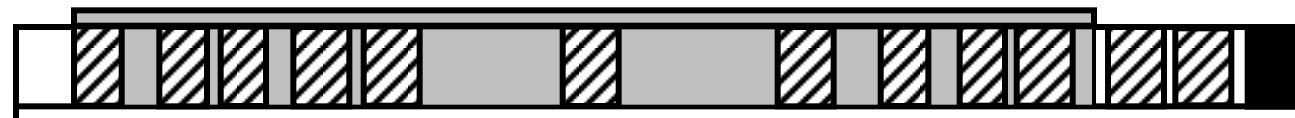

Mfsd4d

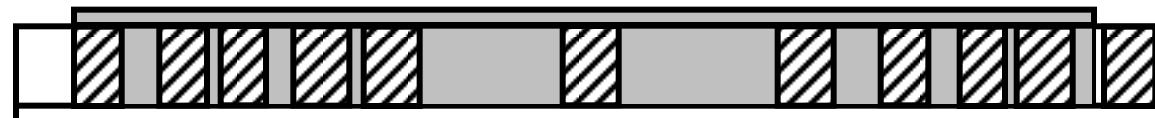

| nucleotide substitution, this study | amino acid change, this study | substitution, Giovane <i>et al</i> , 1994 | substitution, Lopez <i>et al</i> , 1994 |
|-------------------------------------|-------------------------------|-------------------------------------------|-----------------------------------------|
| <b>G524C</b>                        | silent                        | <b>G524C</b>                              | <b>G524C</b>                            |
| <b>T794C</b>                        | silent                        | <b>T794C</b>                              | <b>T794C</b>                            |
| -                                   | -                             | C833G                                     | -                                       |
| -                                   | -                             | C864G                                     | -                                       |
| <b>T929C</b>                        | silent                        | <b>T929C</b>                              | <b>T929C</b>                            |
| -                                   | -                             | G1005A                                    | G1005A                                  |
| -                                   | -                             | G1064A                                    | G1064A                                  |
| <b>A1113G</b>                       | Ile → Val                     | <b>A1113G</b>                             | <b>A1113G</b>                           |
| -                                   | -                             | C1123T                                    | -                                       |
| <b>C1217G</b>                       | Asp → Glu                     | <b>C1217G</b>                             | <b>C1217G</b>                           |
| G1401A                              | Ala → Thr                     | -                                         | -                                       |
| C1481T                              | silent                        | -                                         | -                                       |
| <b>T1490G</b>                       | silent                        | <b>T1490G</b>                             | <b>T1490G</b>                           |
| T1508C                              | silent                        | -                                         | -                                       |

Supplemental Table S1.

| <b><i>Gene, mRNA</i></b> | <b>Donor site</b>                    | <b>Acceptor site</b>        |
|--------------------------|--------------------------------------|-----------------------------|
| <i>Elk1</i> , Elk1       | GATAAG/ <u>g</u> tatgg- intron 2     | -cacttctc <u>a</u> g/AATATC |
| Elk1b                    | GATAAG/ <u>g</u> tatgg- (within ex3) | -accctgc <u>a</u> g/GAGTAC  |
| <i>Elk3</i> , Elk3       | GCACAG/ <u>g</u> taagc- intron 3     | -tgtcttct <u>a</u> g/ACACCA |
| Elk3d                    | GACAAG/ <u>g</u> taaag- (skip ex3)   | -tgtcttct <u>a</u> g/ACACCA |
| <i>Elk4</i> , Elk4       | TCACAG/ <u>g</u> tagct- intron 3     | -tgtgttgc <u>a</u> g/ACTCCC |
| Elk4c                    | ACTCTG/ <u>g</u> tttgt- (within ex3) | -tgtgttgc <u>a</u> g/ACTCCC |
| Elk4d                    | GTAAAG/ <u>g</u> taaat- (skip ex3)   | -tgtgttgc <u>a</u> g/ACTCCC |
| Elk4e                    | CTGACG/ <u>g</u> taggc- (within ex3) | -tgtgttgc <u>a</u> g/ACTCCC |

Supplemental Table S2.

| <b>mRNA</b> | <b>Donor site</b>                                                | <b>Acceptor site</b> |
|-------------|------------------------------------------------------------------|----------------------|
| Pctaire2a   | AGACAG/ <u>gt</u> gtgt-(join ex16/17)-tatat <u>tttag</u> /GACATG |                      |
| 2b/2c/2d    | AGACAG/ <u>gt</u> gtgt-(join ex16/18)-gacg <u>tttcag</u> /CCTTAT |                      |
| 2b          | CTGAAG/ <u>gt</u> aaga-(join ex18/21)-tcttccac <u>ag</u> /GGGGAC |                      |
| 2c          | CTGAAG/ <u>gt</u> aaga-(join ex18/19)-ttt <u>cactcag</u> /TTCCTA |                      |
| 2d          | CTGAAG/ <u>gt</u> aaga-(join ex18/20)-ctctt <u>tgca</u> g/CTCCTG |                      |
| 2c          | CCACAG/ <u>gt</u> gggt-(join ex19/21)-tcttccac <u>ag</u> /GGGGAC |                      |
| 2d          | GACTGG/ <u>gt</u> tagt-(join ex20/21)-tcttccac <u>ag</u> /GGGGAC |                      |



| <b>Mfsd4 mRNA</b> | <b>Donor site</b>       | <b>Acceptor site</b>                      |
|-------------------|-------------------------|-------------------------------------------|
| 4a/4b/4c          | GGCTTG/ <u>g</u> taggt- | (join ex8/9) -tctctggc <u>a</u> g/ATCTTT  |
| 4d                | GGCTTG/ <u>g</u> taggt- | (join ex8/9*)-ttttccac <u>a</u> g/GATACA  |
| 4a/4c             | CATCAG/ <u>g</u> taaga- | (join ex9/11)-gtgtttac <u>a</u> g/GTGAAA  |
| 4b/4d             | CATCAG/ <u>g</u> taaga- | (join ex9/10)-tcttttg <u>t</u> ag/TTCTTA  |
| 4a                | CCTTCA/ <u>g</u> taagt- | (join ex11/12)-tcaatgcc <u>a</u> g/GGACGC |
| 4c                | CCTTCA/ <u>g</u> taagt- | (join ex11/13)-tcttctg <u>c</u> ag/GTCTGG |

Supplemental Table S4.

| sequence                    | nt | start       | Elk4 mRNA  | exon |
|-----------------------------|----|-------------|------------|------|
| TGGAGCCAAGACCTCTAGTCGCAA    | 24 | 133,845,321 | 735-758    | 3    |
| TAGCAGAGAAGAAAGCCCAGG       | 21 | 133,845,452 | 866-886    | 3    |
| TCGAGCCTGTCGCTGCTGCC        | 20 | 133,845,527 | 941-960    | 3    |
| TGAGAGACCAAGGGACTAGGAAACA   | 25 | 133,851,215 | 1656-1680  | 5    |
| TCAGGAGTGGGAGAAACCTTAGGCCG  | 25 | 133,851,776 | 2217-2240  | 5    |
| TGAGCTCTGACATGACAGTTCCA     | 23 | 133,851,831 | 2272-2294  | 5    |
| TGAGCTCTGACATGACAGTTCCACA   | 25 | 133,851,831 | 2272-2296  | 5    |
| TGGTGTGTGCTTTGAGTGGTGTG     | 23 | 133,852,035 | 2476-2498  | 5    |
| CTTGCAGTTAGCTGGAGATGCA      | 22 | 133,852,338 | 2779-2808  | 5    |
| TGCTAATTCACAGTGAATCTTGAA    | 26 | 133,852,541 | 2982-3007  | 5    |
| TAATGGGCTTGCTTCTCATGGTG     | 23 | 133,852,893 | 3334-3356  | 5    |
| TTGGAATTTCCCTCAGCAGCACTT    | 24 | 133,852,939 | 3380-3403  | 5    |
| TTAGCACAGAGCTGCCTTGGGTCC    | 24 | 133,853,130 | 3571-3594  | 5    |
| TAGCACAGAGCTGCCTTGGGTC      | 22 | 133,853,131 | 3572-3593  | 5    |
| TGGAAGCACGTGCTTGGTCTGTGGA   | 25 | 133,853,388 | not proven | -    |
| AACAGATACTCAGGGAGA          | 18 | 133,853,560 | not proven | -    |
| TGAGGCAAGGGAGGAGCAGCCTGTCAG | 27 | 133,853,657 | not proven | -    |
| TTGGTCCCCTGTGGTGGGTCTGGA    | 24 | 133,853,834 | not proven | -    |

Supplemental Table S5.
